# Supplementary material
Source: publisher figshare collection journal article supplement (https://tandf.figshare.com/ndownloader/files/21785271)
Supplement: Supplementary file 1 [file 21785271]

**Evaluating the 2018 Extreme Flood Hazard Events in Kerala, India**

**Preet Lal1,7, Aniket Prakash1, Amit Kumar*,1,6, Prashant K. Srivastava2,**

**Parul Srivastava3, Purabi Saikia4,6, A.C. Pandey1 and M.L. Khan5,6**

1Department of Geoinformatics, Central University of Jharkhand, Ranchi – 835205, India

2Institute of Environment and Sustainable Development, Banaras Hindu University, Varanasi-221005, India

3IORA Ecological Solution Limited, New Delhi, India

4Department of Environmental Sciences, Central University of Jharkhand, Ranchi – 835205, India

5Department of Botany, Dr Harisingh Gour Vishwavidyalaya (A Central University) Sagar, Madhya Pradesh-470003, India

6IUCN Commission of Ecosystem Management

7Department of Earth and Environmental Sciences, Indian Institute of Science Education and Research Bhopal – 462066, India

*Corresponding Author (e-mail: [amit.kumar@cuj.ac.in](mailto:amit.kumar@cuj.ac.in); [amit.iirs@gmail.com](mailto:amit.iirs@gmail.com); +91 7004773095

**Supplementary Files**


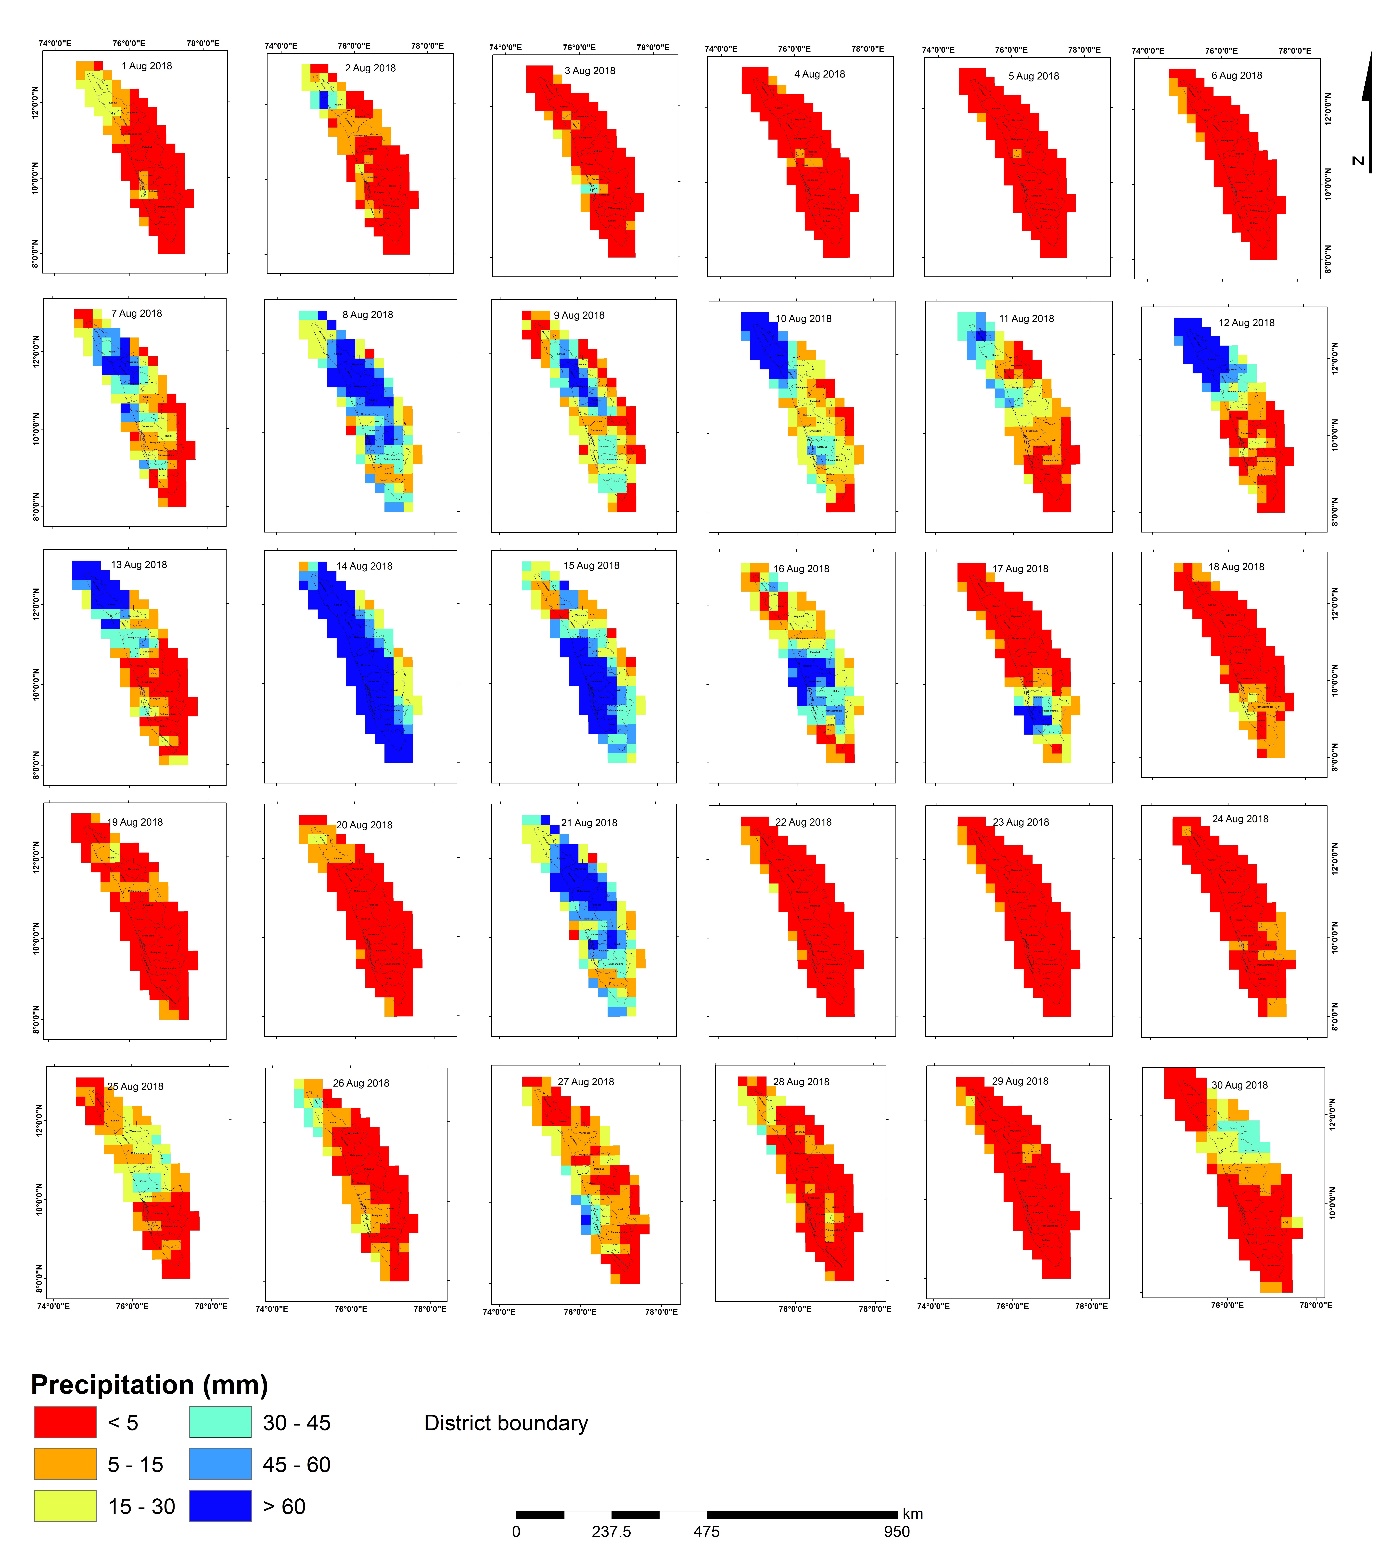


Figure S1: TRMM based daily cumulative precipitation in Kerala State during August 2018 (mm day–1)


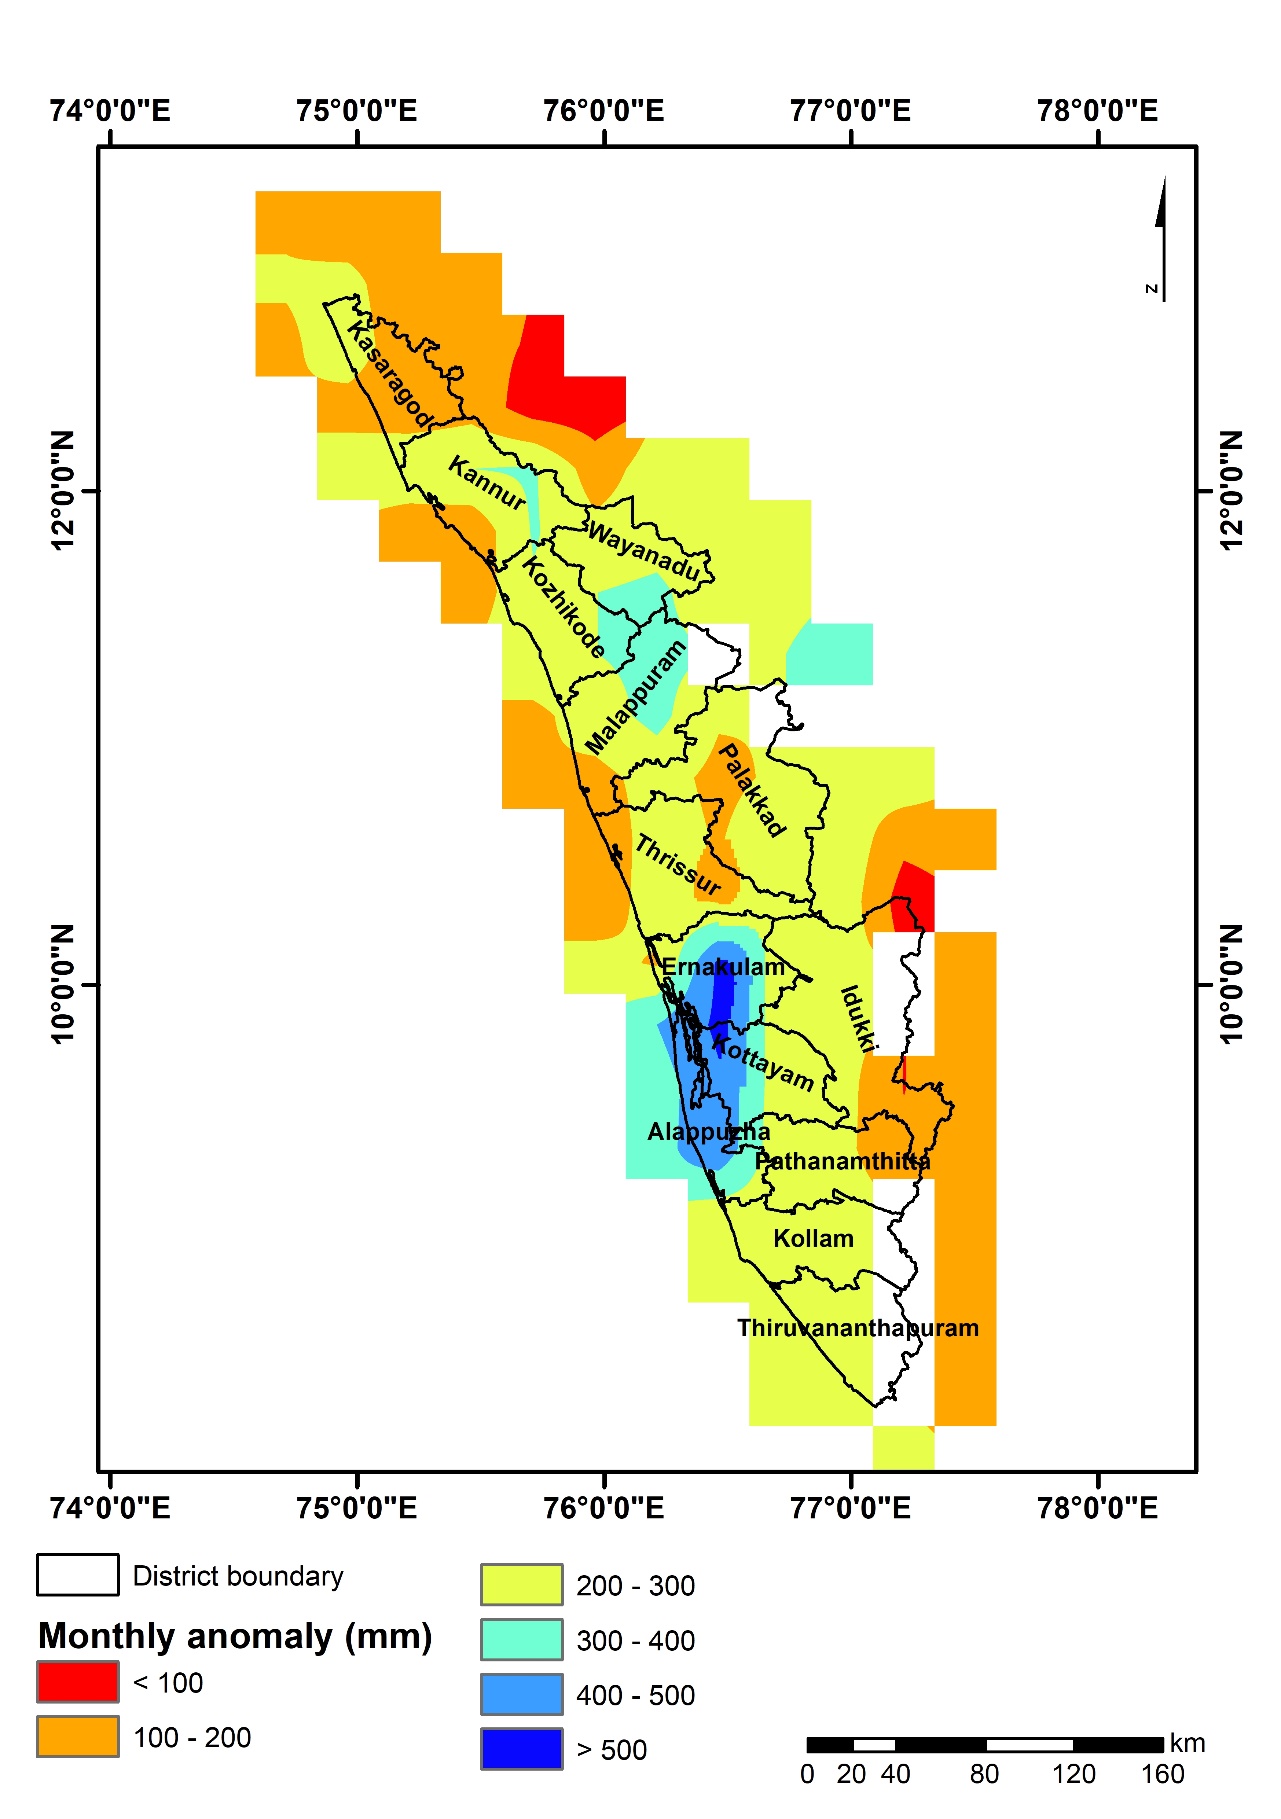


Figure S2: TRMM based precipitation anomaly of August 2018 with reference to long term mean (1901-2017)
